# Supplementary material for: Parameterization of Wind Evolution using Lidar
Source: Copernicus journal article supplement (doi:10.5194/wes-2020-50), 2020-03-17

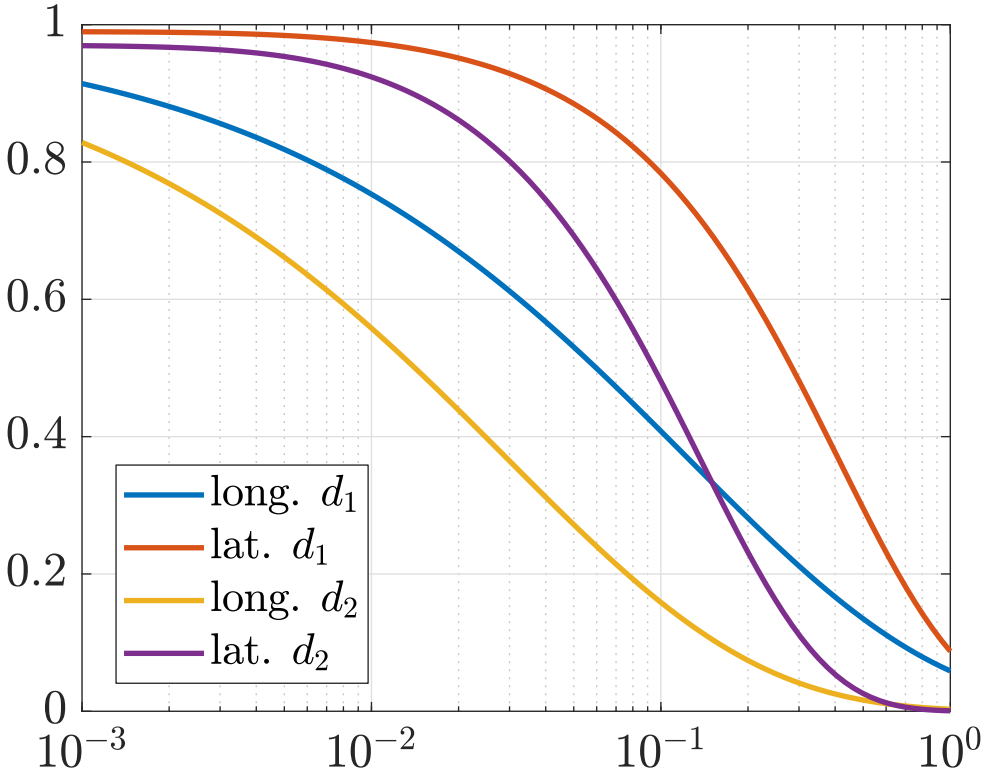

Supplement: Supplementary file [file wes-2020-50-AC1-supplement.pdf]
